# Supplementary material
Source: publisher figshare collection journal article supplement (https://springernature.figshare.com/ndownloader/files/13103318)
Supplement: Supplementary file 1 [file 13103318]

Review articles (excluded at full-text stage)

The following articles were considered reviews of systematic conservation planning and evaluation of the discipline, rather than examples of relevant interventions.

1. Balmford A. Conservation planning in the real world: South Africa shows the way. Trends Ecol. Evol. 2003;18:435–8.
2. Cowling R., Pressey R. Introduction to systematic conservation planning in the Cape Floristic Region. Biol. Conserv. 2003;112:1–13.
3. Esfandeh S, Kaboli M, Eslami-Andargoli L. A Chronological review on application of MARXAN tool for systematic conservation planning in landscape. Int. J. Eng. Appl. Sci. 2015;2:6–17.
4. Knight AT, Driver A, Cowling RM, Maze K, Desmet PG, Lombard AT, et al. Designing systematic conservation assessments that promote effective implementation: Best practice from South Africa. Conserv. Biol. 2006;20:739–50.
5. Leslie H. A synthesis of marine conservation planning approaches. Conserv. Biol. Blackwell Science Inc; 2005;19:1701–13.
6. McIntosh EJ, Pressey RL, Lloyd S, Smith RJ, Grenyer R. The impact of systematic conservation planning. Annu. Rev. Environ. Resour. 2017;42:677–97.
7. Wiersma YF, Sleep DJH. A review of applications of the six-step method of systematic conservation planning. For. Chron. 2016;92:322–35.

Note: none of these are systematic reviews and they vary in their form and content. It is possible that other papers which could be loosely referred to as a review have been screened at full-text instead.
